# Supplementary material for: Evaluating the Barriers to Industrial Symbiosis Using a Group AHP-TOPSIS Model
Source: MDPI journal article supplement (doi:10.3390/su14116815), 2022-06-02
Supplement: s1 [file s1]

## Supplemental material

# Evaluating the Barriers to Industrial Symbiosis Using a Group AHP-TOPSIS Model

Tian Yang <sup>1</sup>, Changhao Liu <sup>1,\*</sup>, Raymond P. Côté <sup>2</sup>, Jinwen Ye <sup>1</sup> and Weifeng Liu <sup>3</sup>

<sup>1</sup> School of Chemistry and Chemical Engineering, Beijing Institute of Technology, Beijing 100081, China; vito@francesyang.com (T.Y.); nickjn@126.com (J.Y.)

<sup>2</sup> School for Resource and Environmental Studies, Dalhousie University, Halifax, NS B3H 4R2, Canada; rcote@dal.ca

<sup>3</sup> School of Life Science, Beijing Institute of Technology, Beijing 100081, China; breeze@bit.edu.cn

\* Correspondence: changhao.liu@hotmail.com; Tel.: +86-10-8138-1383

|                                                                                                                                |            |
|--------------------------------------------------------------------------------------------------------------------------------|------------|
| <b>Supplementary Materials File S1. Main calculation steps of Group AHP-TOPSIS Decision Model .....</b>                        | <b>S2</b>  |
| <b>Supplementary Materials File S2. Results of AHP procedure in case study.....</b>                                            | <b>S5</b>  |
| <b>Supplementary Materials File S3. Results of Group-TOPSIS Decision model in case study.....</b>                              | <b>S7</b>  |
| <b>Supplementary Materials File S4. Discussion of preferential differences &amp; preferential priorities in case study....</b> | <b>S9</b>  |
| <b>References .....</b>                                                                                                        | <b>S12</b> |

## Supplementary Materials File S1. Main calculation steps of Group AHP-TOPSIS Decision

### Model

AHP and TOPSIS are common and independent methodologies documented in many research papers. Here, we will mainly introduce the interaction and integration between the two methodologies.

#### (1) AHP method

After making pairwise comparisons, the synthesis of the priorities could be achieved by calculating the eigenvalues and eigenvectors of the pairwise comparison matrix [1]. Verified by consistency check, each pairwise comparison matrix can yield a weight vector. There are 8 weight vectors for each expert. One represents the relative importance of 7 generic barriers under the overall objective, while the others represent the relative importance of 23 specific barriers under 7 generic barriers. Each set of weight vectors can be organized as matrix  $C$ :

$$C = \begin{bmatrix} c_{11} & c_{12} & \cdots & c_{1n} \\ c_{21} & c_{22} & \cdots & c_{2n} \\ \vdots & \vdots & & \vdots \\ c_{p1} & c_{p2} & \cdots & c_{pn} \end{bmatrix} \quad (1-1)$$

In Equation 1-1, one of the element  $c_{kj}$  ( $k=1,2, \dots, p; j=1,2, \dots, n$ ) in matrix  $C$  refers to the relative weight of barrier  $i$  evaluated by expert  $k$ .

#### (2) Preferential differences integration

According to Huang and Li [2], in our study, we defined the weighted difference between alternatives  $i$  and  $j$  by expert  $k$  as:

$$\alpha_{kij} = |c_{ki} - c_{kj}|, i \neq j \quad (1-2)$$

It should be noted that  $\alpha_{kij}$  only means the preferential differences for expert  $k$ , so the mean differences for the  $p$  (the amount of the experts) experts can be normalized as [2]:

$$\alpha_k = \frac{\sum_{j < i} \alpha_{kij}}{\sum_{k=1}^p \sum_{i < j} \alpha_{kij}}, 0 < \alpha_k < 1, i \neq j, 1 \leq i < j \leq n \quad (1-3)$$

If  $p=2$   $n=3$ , we can obtain:

$$\alpha_1 = \frac{\alpha_{112} + \alpha_{113} + \alpha_{123}}{\alpha_{112} + \alpha_{113} + \alpha_{123} + \alpha_{212} + \alpha_{213} + \alpha_{223}}$$
$$\alpha_2 = \frac{\alpha_{212} + \alpha_{213} + \alpha_{223}}{\alpha_{112} + \alpha_{113} + \alpha_{123} + \alpha_{212} + \alpha_{213} + \alpha_{223}}$$

"If  $\alpha_k$  is a small value, the preferential difference for expert  $k$  is also small, which means he/she

is unable to or has no interest in decisively discriminating these alternatives, and thus may have similar preferences for all of them" [2].

### (3) Preferential priorities integration

Based on Huang and Li [2], the preference ranking is defined as  $\varphi_{ki}$ , which represents the weight ranking of criteria  $i$  by expert  $k$ . It should be noted that "if some alternatives are tied with the same rank, they are all assigned the rank which is the average of their original ranking positions" [2].

For example, in our study, if the weight given by the expert  $k$  is [0.2 0.2 0.1 0.3], then:

$$\varphi_{k1} = 2.5, \varphi_{k2} = 2.5, \varphi_{k3} = 1, \varphi_{k4} = 4$$

The preference priority of criteria  $i$  can be defined as:

$$\beta_i = \sum_{k=1}^p \frac{n}{\varphi_{ki}} \quad (1-4)$$

Then  $\beta_i$  is normalized as:

$$\beta_i = \frac{\beta_i}{\sum_{k=1}^p \beta_i} \quad (1-5)$$

Using the preference priority can emphasize "the importance of the best-ranked alternative which is often much more important than other alternatives" [2]. In this study, this means that the larger the  $\beta_i$  is, the higher the score the expert gives to the barrier  $i$ , indicating that the barrier  $i$  should be more important.

### (4) TOPSIS aggregation

First, the original  $C$  matrix is modified by preferential differences and preferential priorities:

$$v_{ki} = \alpha_k \cdot c_{ki} \cdot \beta_i \quad (1-6)$$

$G$  represents the modified  $C$  matrix:

$$G = \begin{bmatrix} v_{11} & v_{12} & \cdots & v_{1n} \\ v_{21} & v_{22} & \cdots & v_{2n} \\ \vdots & \vdots & \ddots & \vdots \\ v_{p1} & v_{p2} & \cdots & v_{pn} \end{bmatrix} \quad (1-7)$$

The group positive and negative ideal solutions are defined as follows:

$$v_{Gk}^* = \left\{ \max_i v_{ki} | i = 1, 2, \dots, n \right\} \quad (1-8)$$

$$v_{Gk}^- = \left\{ \min_i v_{ki} | i = 1, 2, \dots, n \right\} \quad (1-9)$$

$$A_G^* = \{v_{G1}^*, v_{G2}^*, \dots, v_{Gk}^*, \dots, v_{Gp}^*\} \quad (1-10)$$

$$A_G^- = \{v_{G1}^-, v_{G2}^-, \dots, v_{Gk}^-, \dots, v_{Gp}^-\} \quad (1-11)$$

The distances of alternative  $i$  to the group positive ideal solution ( $S_{Gi}^*$ ) and the group negative ideal solution ( $S_{Gi}^-$ ) can be defined as:

$$S_{Gi}^* = \sqrt{\sum_{k=1}^p (v_{ki} - v_{Gk}^*)^2} \quad (1-12)$$

$$S_{Gi}^- = \sqrt{\sum_{k=1}^p (v_{ki} - v_{Gk}^-)^2} \quad (1-13)$$

The relative closeness of alternative  $i$  by the group,  $C_{Gi}$ , can thus be derived as:

$$C_{Gi} = \frac{S_{Gi}^*}{S_{Gi}^* + S_{Gi}^-} \quad (1-14)$$

Then  $C_{Gi}$  can be normalized as:

$$C_{Gi} = \frac{C_{Gi}}{\sum_{i=1}^n C_{Gi}} \quad (1-15)$$

The larger  $C_{Gi}$  is, the more important the barrier  $i$  is, i.e., the weightage value of generic barriers under overall objective and specific barriers under generic barriers can be achieved. The weightage value of the generic barriers under the overall objective can be obtained by multiplying the weightage values of generic barriers with the weightage value of each specific barrier [3].

## Supplementary Materials File S2. Results of AHP procedure in case study

The weights of both generic barriers and specific barriers given by each expert are shown in Tables S1–S3.

Table S1. Relative weights of generic barriers.

| Expert | B1     | B2     | B3     | B4     | B5     | B6     | B7     |
|--------|--------|--------|--------|--------|--------|--------|--------|
| 1      | 0.1653 | 0.0701 | 0.0599 | 0.1339 | 0.0394 | 0.0395 | 0.4920 |
| 2      | 0.0282 | 0.0599 | 0.0541 | 0.1253 | 0.4268 | 0.1560 | 0.1496 |
| 3      | 0.0831 | 0.1894 | 0.2819 | 0.0745 | 0.0641 | 0.1604 | 0.1465 |
| 4      | 0.1314 | 0.1389 | 0.1872 | 0.1098 | 0.1872 | 0.1227 | 0.1227 |
| 5      | 0.0535 | 0.0764 | 0.0891 | 0.3386 | 0.1392 | 0.1910 | 0.1122 |
| 6      | 0.0291 | 0.0686 | 0.2042 | 0.0937 | 0.0937 | 0.1142 | 0.3964 |
| 7      | 0.2633 | 0.0930 | 0.1100 | 0.1907 | 0.1165 | 0.0930 | 0.1334 |
| 8      | 0.0406 | 0.1982 | 0.1003 | 0.1057 | 0.1905 | 0.1531 | 0.2117 |
| 9      | 0.0850 | 0.2347 | 0.1813 | 0.1008 | 0.2331 | 0.1329 | 0.0322 |
| 10     | 0.0109 | 0.4968 | 0.2350 | 0.1464 | 0.0421 | 0.0386 | 0.0302 |
| 11     | 0.1427 | 0.0728 | 0.1236 | 0.1998 | 0.0613 | 0.1347 | 0.2650 |
| 12     | 0.0988 | 0.1358 | 0.0604 | 0.1723 | 0.1380 | 0.0763 | 0.3183 |
| 13     | 0.0880 | 0.0655 | 0.1273 | 0.4778 | 0.0135 | 0.2048 | 0.0232 |
| 14     | 0.1421 | 0.4262 | 0.0701 | 0.0633 | 0.0703 | 0.0859 | 0.1421 |
| 15     | 0.1289 | 0.1304 | 0.3005 | 0.0724 | 0.0630 | 0.1923 | 0.1127 |
| 16     | 0.3427 | 0.0763 | 0.0705 | 0.1438 | 0.1160 | 0.0862 | 0.1646 |
| 17     | 0.1522 | 0.0872 | 0.3468 | 0.1403 | 0.1005 | 0.0786 | 0.0945 |
| 18     | 0.1247 | 0.1247 | 0.3330 | 0.0619 | 0.1566 | 0.1149 | 0.0843 |
| 19     | 0.0975 | 0.1173 | 0.2530 | 0.2546 | 0.1045 | 0.0557 | 0.1173 |
| 20     | 0.1682 | 0.1574 | 0.0899 | 0.1375 | 0.1279 | 0.1682 | 0.1509 |
| 21     | 0.1317 | 0.0546 | 0.0615 | 0.0186 | 0.5361 | 0.1703 | 0.0273 |
| 22     | 0.1172 | 0.3062 | 0.2113 | 0.1243 | 0.1264 | 0.0654 | 0.0493 |
| 23     | 0.0903 | 0.0757 | 0.4077 | 0.2271 | 0.0875 | 0.0559 | 0.0559 |
| 24     | 0.3322 | 0.0325 | 0.0890 | 0.1272 | 0.0456 | 0.0745 | 0.2990 |
| 25     | 0.0955 | 0.2612 | 0.0331 | 0.0842 | 0.3614 | 0.0739 | 0.0907 |

Table S2. Relative weights of specific barriers under B1,B2,B3

| Expert | C1<br>(B1) | C2<br>(B1) | C3<br>(B1) | C4<br>(B1) | C5<br>(B2) | C6<br>(B2) | C7<br>(B2) | C8<br>(B3) | C9<br>(B3) | C10<br>(B3) | C11<br>(B3) |
|--------|------------|------------|------------|------------|------------|------------|------------|------------|------------|-------------|-------------|
| 1      | 0.6250     | 0.1250     | 0.1250     | 0.1250     | 0.4600     | 0.2211     | 0.3189     | 0.1513     | 0.5848     | 0.1320      | 0.1320      |
| 2      | 0.0990     | 0.0864     | 0.4319     | 0.3827     | 0.0909     | 0.4545     | 0.4545     | 0.0678     | 0.1318     | 0.1318      | 0.6685      |
| 3      | 0.1034     | 0.5485     | 0.2048     | 0.1433     | 0.2808     | 0.5842     | 0.1350     | 0.2321     | 0.2321     | 0.1340      | 0.4019      |
| 4      | 0.2500     | 0.2500     | 0.2500     | 0.2500     | 0.7007     | 0.2021     | 0.0972     | 0.4755     | 0.2745     | 0.1585      | 0.0915      |
| 5      | 0.6808     | 0.1616     | 0.0279     | 0.1297     | 0.3090     | 0.1095     | 0.5816     | 0.2089     | 0.2795     | 0.4360      | 0.0755      |
| 6      | 0.2224     | 0.1165     | 0.2677     | 0.3934     | 0.3333     | 0.3333     | 0.3333     | 0.1328     | 0.2000     | 0.1004      | 0.5668      |
| 7      | 0.4874     | 0.1625     | 0.2234     | 0.1266     | 0.3189     | 0.4600     | 0.2211     | 0.4073     | 0.2951     | 0.1791      | 0.1185      |
| 8      | 0.1864     | 0.1627     | 0.2458     | 0.4051     | 0.2000     | 0.2000     | 0.6000     | 0.1182     | 0.1182     | 0.2762      | 0.4874      |
| 9      | 0.4114     | 0.4114     | 0.0641     | 0.1131     | 0.5842     | 0.1350     | 0.2808     | 0.3750     | 0.3750     | 0.1250      | 0.1250      |
| 10     | 0.2087     | 0.6428     | 0.0512     | 0.0972     | 0.0980     | 0.0196     | 0.8824     | 0.1461     | 0.2575     | 0.0665      | 0.5300      |
| 11     | 0.0607     | 0.5467     | 0.1420     | 0.2506     | 0.1429     | 0.1429     | 0.7143     | 0.1976     | 0.2224     | 0.1258      | 0.4542      |
| 12     | 0.1182     | 0.1851     | 0.1362     | 0.5605     | 0.4806     | 0.4054     | 0.1140     | 0.1898     | 0.1502     | 0.1205      | 0.5395      |
| 13     | 0.0739     | 0.6615     | 0.1143     | 0.1503     | 0.2000     | 0.2000     | 0.6000     | 0.6631     | 0.0265     | 0.0925      | 0.2179      |
| 14     | 0.1000     | 0.3000     | 0.3000     | 0.3000     | 0.6000     | 0.2000     | 0.2000     | 0.2500     | 0.2500     | 0.2500      | 0.2500      |
| 15     | 0.1850     | 0.2229     | 0.3368     | 0.2553     | 0.4286     | 0.4286     | 0.1429     | 0.2559     | 0.1375     | 0.5160      | 0.0906      |
| 16     | 0.0141     | 0.0959     | 0.7878     | 0.1022     | 0.2583     | 0.6370     | 0.1047     | 0.2321     | 0.4019     | 0.2321      | 0.1340      |
| 17     | 0.0420     | 0.3333     | 0.3124     | 0.3124     | 0.7143     | 0.1429     | 0.1429     | 0.3936     | 0.4373     | 0.0466      | 0.1225      |
| 18     | 0.2500     | 0.2500     | 0.2500     | 0.2500     | 0.4545     | 0.4545     | 0.0909     | 0.3598     | 0.4309     | 0.1516      | 0.0577      |
| 19     | 0.1414     | 0.5311     | 0.2369     | 0.0906     | 0.2000     | 0.2000     | 0.6000     | 0.2072     | 0.3210     | 0.0754      | 0.3965      |
| 20     | 0.4051     | 0.2458     | 0.1864     | 0.1627     | 0.2000     | 0.6000     | 0.2000     | 0.2500     | 0.2500     | 0.2500      | 0.2500      |
| 21     | 0.5631     | 0.1428     | 0.0880     | 0.2061     | 0.0909     | 0.4545     | 0.4545     | 0.2127     | 0.0286     | 0.0992      | 0.6595      |
| 22     | 0.2085     | 0.4874     | 0.2085     | 0.0956     | 0.6370     | 0.1047     | 0.2583     | 0.2626     | 0.1158     | 0.5229      | 0.0988      |
| 23     | 0.1026     | 0.1026     | 0.3974     | 0.3974     | 0.2000     | 0.2000     | 0.6000     | 0.2820     | 0.4246     | 0.0802      | 0.2132      |
| 24     | 0.0374     | 0.5603     | 0.1455     | 0.2568     | 0.0769     | 0.6923     | 0.2308     | 0.1484     | 0.0797     | 0.4727      | 0.2992      |
| 25     | 0.0833     | 0.7500     | 0.0833     | 0.0833     | 0.6586     | 0.1852     | 0.1562     | 0.0917     | 0.0665     | 0.1210      | 0.7208      |

Table S3. Relative weights of specific barriers under B4,B5,B6,B7

| Expert | C12<br>(B4) | C13<br>(B4) | C14<br>(B4) | C15<br>(B4) | C16<br>(B4) | C17<br>(B5) | C18<br>(B5) | C19<br>(B6) | C20<br>(B6) | C21<br>(B6) | C22<br>(B7) | C23<br>(B7) |
|--------|-------------|-------------|-------------|-------------|-------------|-------------|-------------|-------------|-------------|-------------|-------------|-------------|
| 1      | 0.0716      | 0.3779      | 0.3746      | 0.1178      | 0.0581      | 0.5000      | 0.5000      | 0.2000      | 0.6000      | 0.2000      | 0.5000      | 0.5000      |
| 2      | 0.0687      | 0.0686      | 0.6009      | 0.0830      | 0.1789      | 0.5000      | 0.5000      | 0.1140      | 0.4806      | 0.4054      | 0.5000      | 0.5000      |
| 3      | 0.3553      | 0.2122      | 0.2122      | 0.0618      | 0.1585      | 0.7500      | 0.2500      | 0.3333      | 0.3333      | 0.3333      | 0.1667      | 0.8333      |
| 4      | 0.0305      | 0.0860      | 0.4370      | 0.2232      | 0.2232      | 0.8333      | 0.1667      | 0.4286      | 0.4286      | 0.1429      | 0.5000      | 0.5000      |
| 5      | 0.0696      | 0.0902      | 0.4203      | 0.1559      | 0.2640      | 0.7500      | 0.2500      | 0.2211      | 0.3189      | 0.4600      | 0.5000      | 0.5000      |
| 6      | 0.2676      | 0.3097      | 0.2676      | 0.1100      | 0.0451      | 0.5000      | 0.5000      | 0.5842      | 0.2808      | 0.1350      | 0.7500      | 0.2500      |
| 7      | 0.1690      | 0.0955      | 0.1461      | 0.1875      | 0.4020      | 0.7500      | 0.2500      | 0.1429      | 0.4286      | 0.4286      | 0.2500      | 0.7500      |
| 8      | 0.1058      | 0.1058      | 0.1058      | 0.2631      | 0.4195      | 0.5000      | 0.5000      | 0.1429      | 0.4286      | 0.4286      | 0.5000      | 0.5000      |
| 9      | 0.5966      | 0.0303      | 0.1742      | 0.0820      | 0.1169      | 0.5000      | 0.5000      | 0.4600      | 0.3189      | 0.2211      | 0.5000      | 0.5000      |
| 10     | 0.1412      | 0.3882      | 0.0925      | 0.3417      | 0.0365      | 0.2500      | 0.7500      | 0.0769      | 0.2308      | 0.6923      | 0.5000      | 0.5000      |
| 11     | 0.0743      | 0.2690      | 0.2690      | 0.1185      | 0.2690      | 0.2500      | 0.7500      | 0.1429      | 0.4286      | 0.4286      | 0.5000      | 0.5000      |
| 12     | 0.0625      | 0.2111      | 0.2987      | 0.0547      | 0.3730      | 0.5000      | 0.5000      | 0.1350      | 0.2808      | 0.5842      | 0.2500      | 0.7500      |
| 13     | 0.0769      | 0.2347      | 0.1296      | 0.0484      | 0.5104      | 0.2500      | 0.7500      | 0.1429      | 0.1429      | 0.7143      | 0.5000      | 0.5000      |
| 14     | 0.2300      | 0.1587      | 0.1514      | 0.2300      | 0.2300      | 0.5000      | 0.5000      | 0.3333      | 0.3333      | 0.3333      | 0.5000      | 0.5000      |
| 15     | 0.1439      | 0.1747      | 0.3098      | 0.0865      | 0.2850      | 0.5000      | 0.5000      | 0.4600      | 0.3189      | 0.2211      | 0.7500      | 0.2500      |
| 16     | 0.1939      | 0.0728      | 0.0728      | 0.1939      | 0.4665      | 0.5000      | 0.5000      | 0.2000      | 0.6000      | 0.2000      | 0.2500      | 0.7500      |
| 17     | 0.2000      | 0.2000      | 0.2000      | 0.2000      | 0.2000      | 0.7500      | 0.2500      | 0.3333      | 0.3333      | 0.3333      | 0.2500      | 0.7500      |
| 18     | 0.0769      | 0.2308      | 0.2308      | 0.2308      | 0.2308      | 0.8333      | 0.1667      | 0.1350      | 0.2808      | 0.5842      | 0.5000      | 0.5000      |
| 19     | 0.0743      | 0.1849      | 0.2948      | 0.2230      | 0.2230      | 0.5000      | 0.5000      | 0.3333      | 0.3333      | 0.3333      | 0.5000      | 0.5000      |
| 20     | 0.1508      | 0.3635      | 0.2736      | 0.1061      | 0.1061      | 0.5000      | 0.5000      | 0.3333      | 0.3333      | 0.3333      | 0.5000      | 0.5000      |
| 21     | 0.0589      | 0.1430      | 0.1245      | 0.6205      | 0.0531      | 0.8750      | 0.1250      | 0.7147      | 0.2185      | 0.0668      | 0.5000      | 0.5000      |
| 22     | 0.2000      | 0.2000      | 0.2000      | 0.2000      | 0.2000      | 0.5000      | 0.5000      | 0.3333      | 0.3333      | 0.3333      | 0.5000      | 0.5000      |
| 23     | 0.1118      | 0.1767      | 0.3995      | 0.2279      | 0.0842      | 0.5000      | 0.5000      | 0.3333      | 0.3333      | 0.3333      | 0.5000      | 0.5000      |
| 24     | 0.1149      | 0.1750      | 0.3859      | 0.0952      | 0.2290      | 0.5000      | 0.5000      | 0.2211      | 0.3189      | 0.4600      | 0.2500      | 0.7500      |
| 25     | 0.0155      | 0.0958      | 0.0811      | 0.0114      | 0.7963      | 0.5000      | 0.5000      | 0.3333      | 0.3333      | 0.3333      | 0.5000      | 0.5000      |

### Supplementary Materials File S3. Results of Group-TOPSIS Decision model in case study

The weights derived by AHP should be aggregated by Group TOPSIS Decision Model, including preferential differences integration, preferential priorities integration, and TOPSIS aggregation.

For preferential differences integration and preferential priorities integration,  $\alpha_k$  and  $\beta_i$  can be calculated by Equation 1-3 and Equation 1-5 in the supporting information. There are 8 sets of relative weights from AHP. One represents the relative importance of 7 generic barriers under the overall objective, while the others represent the relative importance of 23 specific barriers under 7 generic barriers. Each set of relative weights should be processed to obtain both a set of  $\alpha_k$  and a set of  $\beta_i$ . The results are shown in Table S4 and Table S5.

Based on  $\alpha_k$  and  $\beta_i$ , relative weights are modified by Equation 1-6 in the supporting information. Through the remaining steps in the supporting information,  $C_{Gi}$  could be calculated. According to the descending order of  $C_{Gi}$ , the degrees of importance of IS barriers have been quantitatively evaluated, i.e., weights of generic barriers (Table 5 and Figure 3), specific barriers (Table 6 and Figure 4), and the specific barriers' degrees of importance corresponding to their generic barriers (Table 6).

Table S4. Preferential differences for the experts

| Expert | $\alpha_k$<br>(generic<br>barriers) | $\alpha_k$<br>(under B1) | $\alpha_k$<br>(under B2) | $\alpha_k$<br>(under B3) | $\alpha_k$<br>(under B4) | $\alpha_k$<br>(under B5) | $\alpha_k$<br>(under B6) | $\alpha_k$<br>(under B7) |
|--------|-------------------------------------|--------------------------|--------------------------|--------------------------|--------------------------|--------------------------|--------------------------|--------------------------|
| 1      | 0.0581                              | 0.0484                   | 0.0221                   | 0.0446                   | 0.0499                   | 0.0000                   | 0.0620                   | 0.0000                   |
| 2      | 0.0514                              | 0.0426                   | 0.0337                   | 0.0584                   | 0.0622                   | 0.0000                   | 0.0569                   | 0.0000                   |
| 3      | 0.0331                              | 0.0451                   | 0.0417                   | 0.0260                   | 0.0339                   | 0.0896                   | 0.0000                   | 0.1600                   |
| 4      | 0.0130                              | 0.0000                   | 0.0560                   | 0.0411                   | 0.0503                   | 0.1194                   | 0.0443                   | 0.0000                   |
| 5      | 0.0391                              | 0.0642                   | 0.0438                   | 0.0373                   | 0.0463                   | 0.0896                   | 0.0370                   | 0.0000                   |
| 6      | 0.0481                              | 0.0283                   | 0.0000                   | 0.0475                   | 0.0364                   | 0.0000                   | 0.0697                   | 0.1200                   |
| 7      | 0.0252                              | 0.0369                   | 0.0221                   | 0.0318                   | 0.0346                   | 0.0896                   | 0.0443                   | 0.1200                   |
| 8      | 0.0274                              | 0.0254                   | 0.0371                   | 0.0410                   | 0.0416                   | 0.0000                   | 0.0443                   | 0.0000                   |
| 9      | 0.0340                              | 0.0432                   | 0.0417                   | 0.0324                   | 0.0649                   | 0.0000                   | 0.0370                   | 0.0000                   |
| 10     | 0.0681                              | 0.0609                   | 0.0800                   | 0.0487                   | 0.0504                   | 0.0896                   | 0.0955                   | 0.0000                   |
| 11     | 0.0305                              | 0.0505                   | 0.0530                   | 0.0327                   | 0.0286                   | 0.0896                   | 0.0443                   | 0.0000                   |
| 12     | 0.0347                              | 0.0444                   | 0.0340                   | 0.0420                   | 0.0462                   | 0.0000                   | 0.0697                   | 0.1200                   |
| 13     | 0.0627                              | 0.0580                   | 0.0371                   | 0.0660                   | 0.0573                   | 0.0896                   | 0.0886                   | 0.0000                   |
| 14     | 0.0450                              | 0.0194                   | 0.0371                   | 0.0000                   | 0.0121                   | 0.0000                   | 0.0000                   | 0.0000                   |
| 15     | 0.0335                              | 0.0157                   | 0.0265                   | 0.0452                   | 0.0311                   | 0.0000                   | 0.0370                   | 0.1200                   |
| 16     | 0.0363                              | 0.0751                   | 0.0494                   | 0.0260                   | 0.0481                   | 0.0000                   | 0.0620                   | 0.1200                   |
| 17     | 0.0338                              | 0.0282                   | 0.0530                   | 0.0468                   | 0.0000                   | 0.0896                   | 0.0000                   | 0.1200                   |
| 18     | 0.0334                              | 0.0000                   | 0.0337                   | 0.0430                   | 0.0163                   | 0.1194                   | 0.0697                   | 0.0000                   |
| 19     | 0.0317                              | 0.0457                   | 0.0371                   | 0.0349                   | 0.0254                   | 0.0000                   | 0.0000                   | 0.0000                   |
| 20     | 0.0116                              | 0.0254                   | 0.0371                   | 0.0000                   | 0.0361                   | 0.0000                   | 0.0000                   | 0.0000                   |
| 21     | 0.0661                              | 0.0480                   | 0.0337                   | 0.0650                   | 0.0645                   | 0.1343                   | 0.1005                   | 0.0000                   |
| 22     | 0.0370                              | 0.0379                   | 0.0494                   | 0.0460                   | 0.0000                   | 0.0000                   | 0.0000                   | 0.0000                   |
| 23     | 0.0487                              | 0.0380                   | 0.0371                   | 0.0357                   | 0.0395                   | 0.0000                   | 0.0000                   | 0.0000                   |
| 24     | 0.0503                              | 0.0542                   | 0.0571                   | 0.0431                   | 0.0368                   | 0.0000                   | 0.0370                   | 0.1200                   |
| 25     | 0.0473                              | 0.0645                   | 0.0466                   | 0.0646                   | 0.0874                   | 0.0000                   | 0.0000                   | 0.0000                   |

Table S5. Preferential priorities for the IS barriers

| Generic barriers | $\beta_i$ | Under B1 | $\beta_i$ | Under B2 | $\beta_i$ | Under B3 | $\beta_i$ | Under B4 | $\beta_i$ | Under B5 | $\beta_i$ | Under B6 | $\beta_i$ | Under B7 | $\beta_i$ |
|------------------|-----------|----------|-----------|----------|-----------|----------|-----------|----------|-----------|----------|-----------|----------|-----------|----------|-----------|
| B1               | 0.137     | C1       | 0.224     | C5       | 0.367     | C8       | 0.233     | C12      | 0.152     | C17      | 0.529     | C19      | 0.290     | C22      | 0.471     |
| B2               | 0.147     | C2       | 0.312     | C6       | 0.302     | C9       | 0.266     | C13      | 0.201     | C18      | 0.471     | C20      | 0.287     | C23      | 0.529     |
| B3               | 0.170     | C3       | 0.240     | C7       | 0.331     | C10      | 0.219     | C14      | 0.244     |          |           | C21      | 0.423     |          |           |
| B4               | 0.140     | C4       | 0.224     |          |           | C11      | 0.282     | C15      | 0.165     |          |           |          |           |          |           |
| B5               | 0.135     |          |           |          |           |          |           | C16      | 0.239     |          |           |          |           |          |           |
| B6               | 0.115     |          |           |          |           |          |           |          |           |          |           |          |           |          |           |
| B7               | 0.156     |          |           |          |           |          |           |          |           |          |           |          |           |          |           |



## Supplementary Materials File S4. Discussion of preferential differences & preferential priorities in case study

In order to discuss the two characteristics of "preferential differences" and "preferential priorities", we take the results of comparison of 7 generic barriers as an example.

| Expert | Governmental barriers (B1) | Economic barriers (B2) | Technological barriers (B3) | Organizational barriers (B4) | Informational barriers (B5) | Cognitive & motivational barriers (B6) | Safety barriers (B7) | Range (max-min) | preferential difference |
|--------|----------------------------|------------------------|-----------------------------|------------------------------|-----------------------------|----------------------------------------|----------------------|-----------------|-------------------------|
| 1      | 16.53%                     | 7.01%                  | 5.99%                       | 13.39%                       | 3.94%                       | 3.95%                                  | 49.20%               | 0.4525          | 0.0581                  |
| 2      | 2.82%                      | 5.99%                  | 5.41%                       | 12.53%                       | 42.68%                      | 15.60%                                 | 14.96%               | 0.3987          | 0.0514                  |
| 3      | 8.31%                      | 18.94%                 | 28.19%                      | 7.45%                        | 6.41%                       | 16.04%                                 | 14.65%               | 0.2178          | 0.0331                  |
| 4      | 13.14%                     | 13.89%                 | 18.72%                      | 10.98%                       | 18.72%                      | 12.27%                                 | 12.27%               | 0.0774          | 0.013                   |
| 5      | 5.35%                      | 7.64%                  | 8.91%                       | 33.86%                       | 13.92%                      | 19.10%                                 | 11.22%               | 0.2851          | 0.0391                  |
| 6      | 2.91%                      | 6.86%                  | 20.42%                      | 9.37%                        | 9.37%                       | 11.42%                                 | 39.64%               | 0.3673          | 0.0481                  |
| 7      | 26.33%                     | 9.30%                  | 11.00%                      | 19.07%                       | 11.65%                      | 9.30%                                  | 13.34%               | 0.1703          | 0.0252                  |
| 8      | 4.06%                      | 19.82%                 | 10.03%                      | 10.57%                       | 19.05%                      | 15.31%                                 | 21.17%               | 0.1711          | 0.0274                  |
| 9      | 8.50%                      | 23.47%                 | 18.13%                      | 10.08%                       | 23.31%                      | 13.29%                                 | 3.22%                | 0.2025          | 0.034                   |
| 10     | 1.09%                      | 49.68%                 | 23.50%                      | 14.64%                       | 4.21%                       | 3.86%                                  | 3.02%                | 0.4859          | 0.0681                  |
| 11     | 14.27%                     | 7.28%                  | 12.36%                      | 19.98%                       | 6.13%                       | 13.47%                                 | 26.50%               | 0.2037          | 0.0305                  |
| 12     | 9.88%                      | 13.58%                 | 6.04%                       | 17.23%                       | 13.80%                      | 7.63%                                  | 31.83%               | 0.2579          | 0.0347                  |
| 13     | 8.80%                      | 6.55%                  | 12.73%                      | 47.78%                       | 1.35%                       | 20.48%                                 | 2.32%                | 0.4643          | 0.0627                  |
| 14     | 14.21%                     | 42.62%                 | 7.01%                       | 6.33%                        | 7.03%                       | 8.59%                                  | 14.21%               | 0.3629          | 0.045                   |
| 15     | 12.89%                     | 13.04%                 | 30.05%                      | 7.24%                        | 6.30%                       | 19.23%                                 | 11.27%               | 0.2375          | 0.0335                  |
| 16     | 34.27%                     | 7.63%                  | 7.05%                       | 14.38%                       | 11.60%                      | 8.62%                                  | 16.46%               | 0.2722          | 0.0363                  |
| 17     | 15.22%                     | 8.72%                  | 34.68%                      | 14.03%                       | 10.05%                      | 7.86%                                  | 9.45%                | 0.2682          | 0.0338                  |
| 18     | 12.47%                     | 12.47%                 | 33.30%                      | 6.19%                        | 15.66%                      | 11.49%                                 | 8.43%                | 0.2711          | 0.0334                  |
| 19     | 9.75%                      | 11.73%                 | 25.30%                      | 25.46%                       | 10.45%                      | 5.57%                                  | 11.73%               | 0.1989          | 0.0317                  |
| 20     | 16.82%                     | 15.74%                 | 8.99%                       | 13.75%                       | 12.79%                      | 16.82%                                 | 15.09%               | 0.0783          | 0.0116                  |
| 21     | 13.17%                     | 5.46%                  | 6.15%                       | 1.86%                        | 53.61%                      | 17.03%                                 | 2.73%                | 0.5175          | 0.0661                  |
| 22     | 11.72%                     | 30.62%                 | 21.13%                      | 12.43%                       | 12.64%                      | 6.54%                                  | 4.93%                | 0.2569          | 0.037                   |
| 23     | 9.03%                      | 7.57%                  | 40.77%                      | 22.71%                       | 8.75%                       | 5.59%                                  | 5.59%                | 0.3518          | 0.0487                  |
| 24     | 33.22%                     | 3.25%                  | 8.90%                       | 12.72%                       | 4.56%                       | 7.45%                                  | 29.90%               | 0.2997          | 0.0503                  |
| 25     | 9.55%                      | 26.12%                 | 3.31%                       | 8.42%                        | 36.14%                      | 7.39%                                  | 9.07%                | 0.3284          | 0.0473                  |

Figure S1. Results of preferential differences for each expert (comparison of 7 generic barriers)

In Figure S1, the 1st column refers to the sequence number of the expert. The 2nd to the 8th column refers to the weightage value of generic barriers given by AHP, i.e., quantitative results of the importance of the barriers given by each expert. The 9th column refers to the range of each expert, i.e., the difference between the maximum weightage value and the minimum weightage value given by each expert. The 10th column refers to the results of preferential differences for each expert.

In Section 3.2.2, we assume that if an expert is not able to or shows no interest in decisively distinguishing these alternatives, similar preferences may be chosen for all of them [2]. This means that experts give similar weights to barriers. Thus, there is little difference in weights among these barriers, i.e., the range of the judgment is small (especially the 4th expert and the 20th expert). It also means that they have a lower preferential difference.

Huang et al. [4] argued that "it is reasonable that an individual with greater preferential differences among alternatives would have more influence in a group than those who with less preferential differences, since the individual with greater preferential differences would fight for his/her choices, while the other members may be less insistent because of their similar perceptions of all alternatives". Basak [5] argued that "in any rational consensus, those who know more should, accordingly, influence the consensus more strongly than those who are less knowledgeable".

Therefore, in our study, the preferential differences should be considered. From Equation 1-7 and Equation 1-10, experts' preferential differences are proportional to the weights of his/her judgment in the result. So, experts with lower preferential difference would influence the consensus more weakly. This reflects the selection of experts in final judgement based on whether his/her judgement shows similar preferences.

Table S6. Results of preferential priorities for each barrier (comparison of 7 generic barriers)

| Criteria   | Governmental barriers (B1) | Economic barriers (B2) | Technological barriers (B3) | Organizational barriers (B4) | Informational barriers (B5) | Cognitive & motivational barriers (B6) | Safety barriers (B7) |
|------------|----------------------------|------------------------|-----------------------------|------------------------------|-----------------------------|----------------------------------------|----------------------|
| $\leq 1$   | 3                          | 4                      | 6                           | 3                            | 4                           | 1                                      | 5                    |
| $\leq 2$   | 6                          | 7                      | 10                          | 7                            | 6                           | 6                                      | 8                    |
| $\leq 3$   | 12                         | 12                     | 12                          | 12                           | 10                          | 8                                      | 11                   |
| $\leq 4$   | 15                         | 14                     | 14                          | 15                           | 16                          | 12                                     | 15                   |
| $\leq 5$   | 18                         | 18                     | 18                          | 19                           | 18                          | 17                                     | 18                   |
| $\leq 6$   | 20                         | 23                     | 21                          | 21                           | 20                          | 23                                     | 23                   |
| $\leq 7$   | 25                         | 25                     | 25                          | 25                           | 25                          | 25                                     | 25                   |
| p-priority | 0.137                      | 0.147                  | 0.17                        | 0.14                         | 0.135                       | 0.115                                  | 0.156                |

Table S6 shows a summary of the ranking results of experts. For example, " $\leq 1$ " shows how many people rank each barrier as No.1 (most important). " $\leq 2$ " shows how many people rank each barrier as No.1 or No.2. The last row of Table S6 shows results of preferential priorities for each barrier. It can be seen that for B3, B7, and B2, there are many people ranking them as the most important one. Their preferential priorities also rank from the 1st to 3rd, respectively. However, there are 4 experts who rank B5 as the most important one, which is the same as B2. More experts rank B2 as the No.1 or No.2.

So, B3, B7, and B2 should receive greater weightage value relative to the average of the results of AHP. Using the preferential priority assists in emphasizing "the importance of the best ranked alternative which is often much more important than other alternatives" [2], and has been demonstrated by Inti and Tandon [6]. Therefore, from Equation 1-9 and Equation 1-10, the weightage value of

barriers is adjusted by multiplying the value of preferential priorities. It reflects an emphasis on the barriers that more experts consider important.

(a). Results with the consideration of preferential differences and priorities

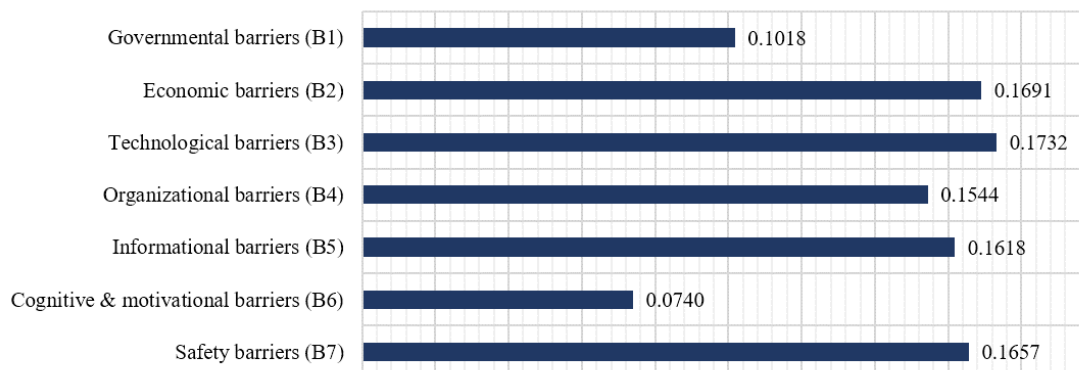

(b). Results without the consideration of preferential differences and priorities

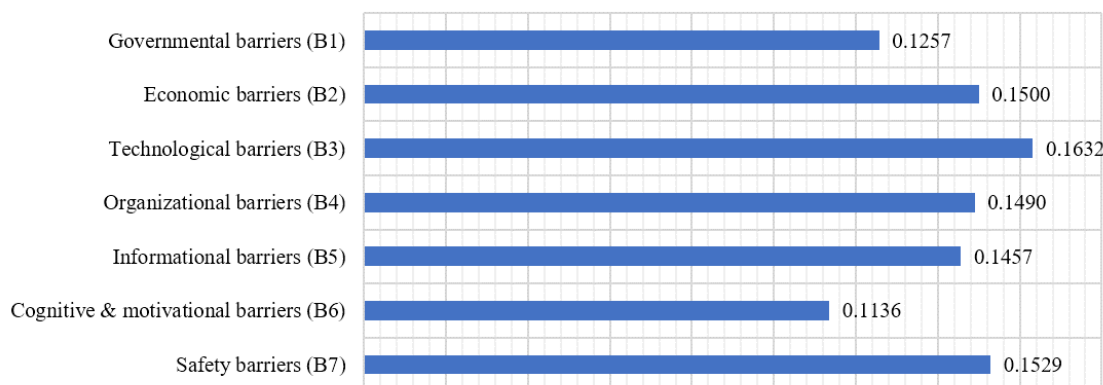

Figure S2. Results with/without the consideration of preferential differences and priorities (comparison of 7 generic barriers)

Figure S2 shows the results with and without (average of the results of AHP) the consideration of differences and preferential priorities. It can be seen that after taking the consideration of the two characteristics, the weightage value of each barrier is distinguished more clearly. Moreover, the weightage value of B3, B7, B2 (0.1732, 0.1657, 0.1691) became greater (0.1632, 0.1529, 0.1500). Preferential differences reflect the selection of experts in final judgment based on whether his/her judgment shows similar preferences, while the preferential priorities reflect an emphasis on the barriers that more experts consider important. So, the weightage value of each barrier is distinguished more clearly and B3, B7, B2 are emphasized. Thus, the two characteristics of "preferential differences" and "preferential priorities" are suitable for this research because they assist in identifying the more important barriers for the development of the IS.

## References

1. Zeshui, X.; Cuiping, W. A Consistency Improving Method in the Analytic Hierarchy Process. *Eur. J. Oper. Res.* **1999**, *116*, 443–449, doi:10.1016/S0377-2217(98)00109-X.
2. Huang, Y.-S.; Li, W.-H. A Study on Aggregation of TOPSIS Ideal Solutions for Group Decision-Making. *Group Decis. Negot.* **2012**, *21*, 461–473, doi:10.1007/s10726-010-9218-2.
3. Mangla, S.K.; Govindan, K.; Luthra, S. Prioritizing the Barriers to Achieve Sustainable Consumption and Production Trends in Supply Chains Using Fuzzy Analytical Hierarchy Process. *J. Clean. Prod.* **2017**, *151*, 509–525, doi:10.1016/j.jclepro.2017.02.099.
4. Huang, Y.-S.; Liao, J.-T.; Lin, Z.-L. A Study on Aggregation of Group Decisions. *Syst. Res. Behav. Sci.* **2009**, *26*, 445–454, doi:10.1002/sres.941.
5. Basak, I.; Saaty, T. Group Decision Making Using the Analytic Hierarchy Process. *State- -Art Surv. TOPSIS Appl.* **1993**, *17*, 101–109, doi:10.1016/0895-7177(93)90179-3.
6. Inti Sundeep; Tandon Vivek Integration of Data Envelopment Analysis-Based Preference Aggregation Method and  $\alpha$  Particle Swarm Optimization Technique into Group Decision Model. *J. Comput. Civ. Eng.* **2017**, *31*, 04016043, doi:10.1061/(ASCE)CP.1943-5487.0000609.
